# Supplementary material
Source: publisher site journal article supplement (https://www.dovepress.com/article/474273)
Supplement: Supplementary file 1 [file get_supplementary_file.php]

**Supplementary data**

**Table S1.** Patient Characteristics (Study 1)

| Age | 72.0±6.4 |
| --- | --- |
| Sex [M/F] | 32/2 |
| BMI | 21.1±3.6 |
| Smoking |  |
| [non/ex/curr] | 1/28/5 |
| Pack·year | 70.3±42.5 |
| COPD stage [I/II/III/IV] | 4/23/6/1 |
| Pulmonary function |  |
| IC (L) | 2.23±0.64 |
| FVC (L) | 3.05±0.70 |
| FVC %pred (%) | 90.0±17.1 |
| FEV1 (L) | 1.69±0.57 |
| FEV1/FVC (%) | 54.8±9.2 |
| FEV1 %pred (%) | 62.3±18.1 |
| 6MWD (m) | 436.8±80.0 |
| mMRC [0/1/2/3/4] | 9/16/4/5/0 |
| Step count (steps) | 3796.3±2193.5 |
| Duration at ≥3.0 METs (min) | 55.3±31.5 |
| Duration at 1.0-1.5 METs (min) | 330.1±93.6 |

**Notes:** Values are shown as the mean ± SD. **Abbreviations:** BMI, body mass index; non, non-smokers; ex, ex-smokers; curr, current smokers; IC, inspiratory capacity; FVC, forced vital capacity; FEV1, forced expiratory volume in one second; %pred, percent of predicted value; 6MWD, 6-minute walk distance; mMRC, modified Medical Research Council dyspnea scale; METs, metabolic equivalents.

**Figure S1.** Flow diagram of study 1.





**

Figure S2.** Flow diagram of study 2.

**Figure S3.** Histogram of sedentary time.





**Figure S4.** Reproducibility of measured and calculated values.

A) Scatter plot, r=0.474, P <0.001, B) Bland-Altman Plot. There was no additive error but there was a proportional error.

**

**
